# Supplementary material
Source: Elsevier journal article supplement (https://www.sciencedirect.com/science/article/pii/S1888989119301028)

# Consenso de expertos sobre propuestas de información al paciente en tratamiento con sales de litio

# Material Suplementario

**Figura S1.** Distribución de las opiniones de los expertos sobre los ítems propuestos en la primera ronda. Las gráficas de la **A** a la **N** representan la distribución de las opiniones de los expertos de los ítems del 1 al 14 respectivamente (Bloque 1). Las gráficas de la **O** a la **T** representan la distribución de las opiniones de los expertos de los ítems del 15 al 20 respectivamente (Bloque 2). Ver Tabla 1 del manuscrito para descripción detallada de cada ítem. Valoración: [1-3], desacuerdo; [4-6], ni acuerdo ni desacuerdo; [7-9], acuerdo.


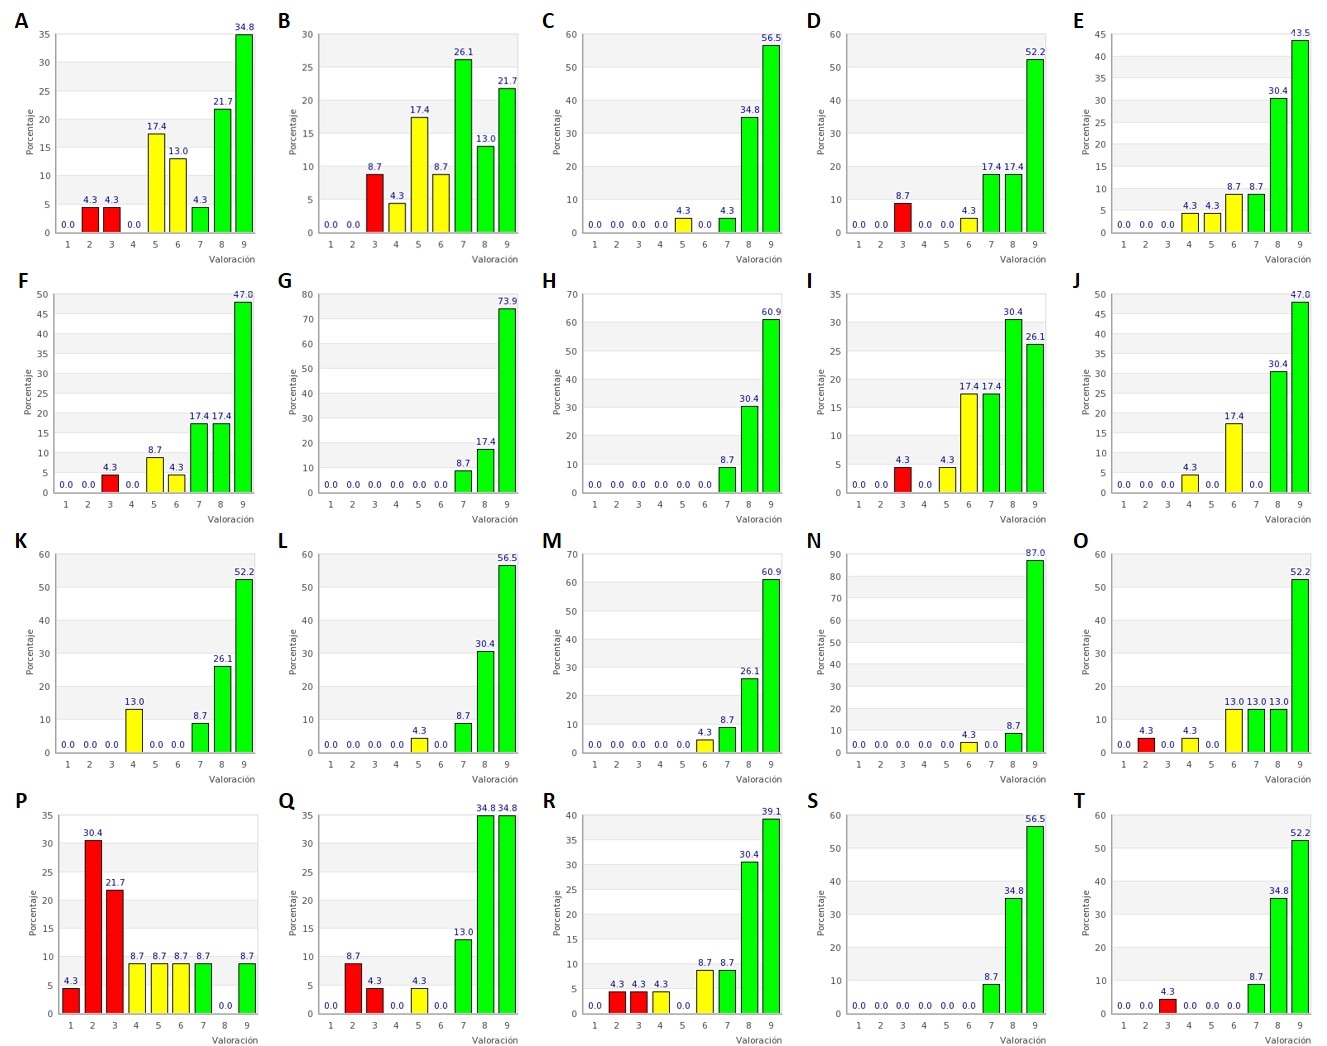

Supplement: mmc1 [file S1888989119301028:mmc1.docx]
